# Supplementary material for: Piranha Solution-Assisted Surface Engineering Enables Silicon Nanocrystals with Superior Wettability and Lithium Storage
Source: MDPI journal article supplement (doi:10.3390/cryst13071127), 2023-07-19
Supplement: s1 [file s1]

## Supporting Information

### Piranha Solution-Assisted Surface Engineering Enables Silicon Nanocrystals with Superior Wettability and Lithium Storage

Tingting Li, Yangfan Li, Fan Zhang, Naiwen Liang, Jiang Yin, Haihong Zhao,\*  
Yahui Yang, Bo Chen,\* Lishan Yang\*

National and Local Joint Engineering Laboratory for New Petrochemical Materials and Fine Utilization of Resources, Key Laboratory of the Assembly and Application of Organic Functional Molecules of Hunan Province, Hunan Normal University, Changsha, 410081, P.R. China.

State Key Laboratory of Organic Electronics and Information Displays & Jiangsu Key Laboratory for Biosensors, Institute of Advanced Materials (IAM), School of Chemistry and Life Sciences, Nanjing University of Posts and Telecommunications, Nanjing, 210023, P. R. China.

E-mail: zhh\_1998@163.com (Haihong Zhao); iambchen@njupt.edu.cn (Bo Chen); lsyang@hunnu.edu.cn (Lishan Yang).

Tel./Fax.: +86 731-88872531 (Lishan Yang).

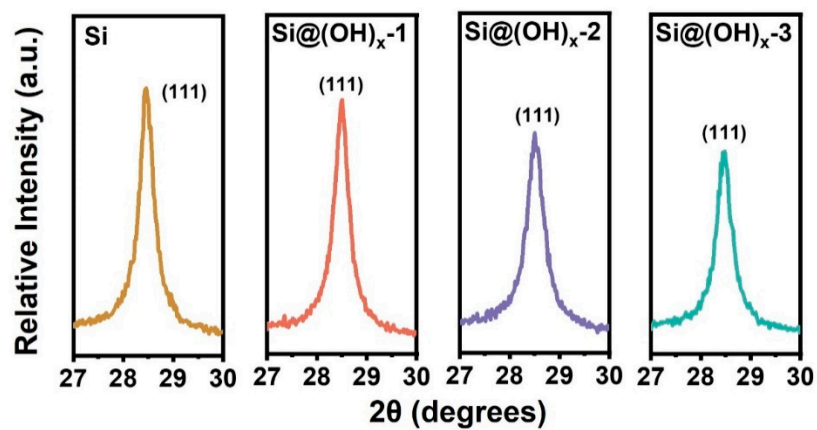

Figure S1. Partial enlargement of XRD patterns of Si, Si@Si(OH)<sub>x</sub>-1, Si@Si(OH)<sub>x</sub>-2, and Si@Si(OH)<sub>x</sub>-3 nanoparticles.

Table S1. Calculated particles sizes of Si, Si@Si(OH)<sub>x</sub>-1, Si@Si(OH)<sub>x</sub>-2, and Si@Si(OH)<sub>x</sub>-3 based on the Scherrer formula.

| Material                  | D (nm) |
|---------------------------|--------|
| Si                        | 16.74  |
| Si@Si(OH) <sub>x</sub> -1 | 16.43  |
| Si@Si(OH) <sub>x</sub> -2 | 14.74  |
| Si@Si(OH) <sub>x</sub> -3 | 16.12  |

Scherrer formula:  $D = \frac{K\lambda}{\beta \cos \theta}$

D: diameter of crystals (nm)

K: scherrer constant (take 0.89)

$\lambda$ : X-ray wavelength (take 0.15406 nm)

$\beta$ : FWHM

$\theta$ : diffraction angle

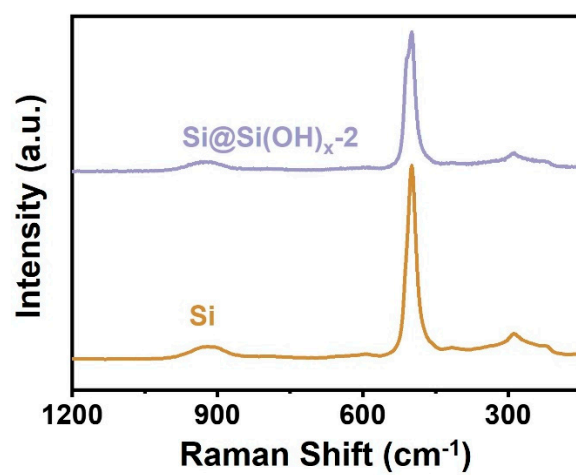

Figure S2. Raman spectra of Si and Si@Si(OH)<sub>x-2</sub>.

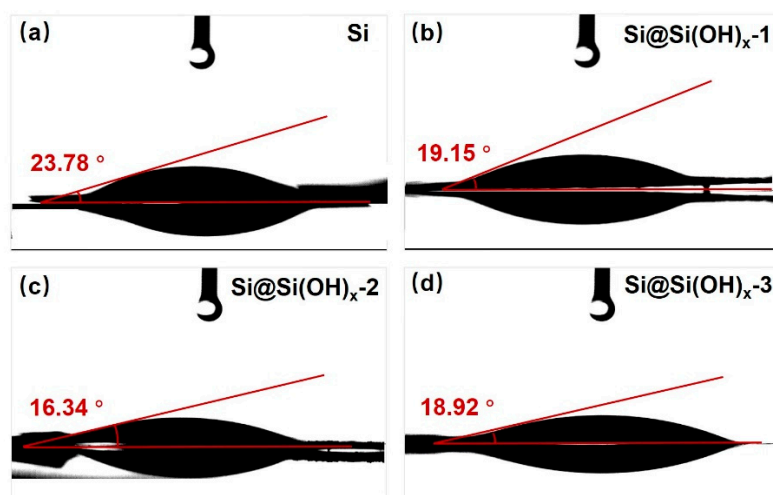

Figure S3. Photos of Si, Si@Si(OH)<sub>x-1</sub>, Si@Si(OH)<sub>x-2</sub>, and Si@Si(OH)<sub>x-3</sub> electrodes after contact angle tests.

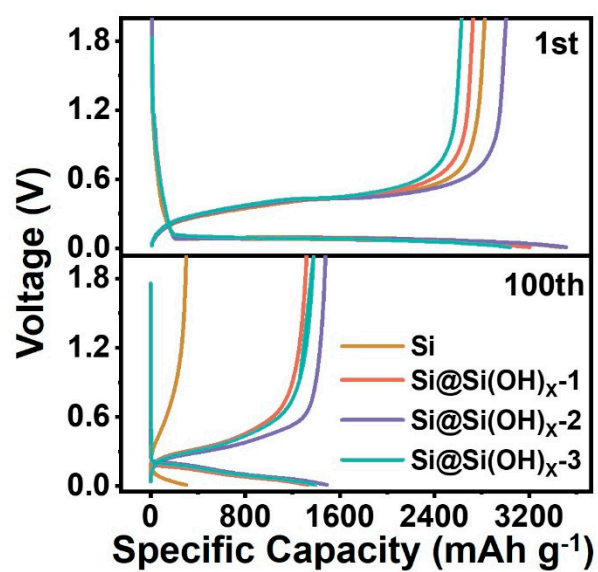

Figure S4. The charge-discharge profiles of Si, Si@Si(OH)<sub>x-1</sub>, Si@Si(OH)<sub>x-2</sub>, and Si@Si(OH)<sub>x-3</sub> anodes at 1st and 100th cycles.

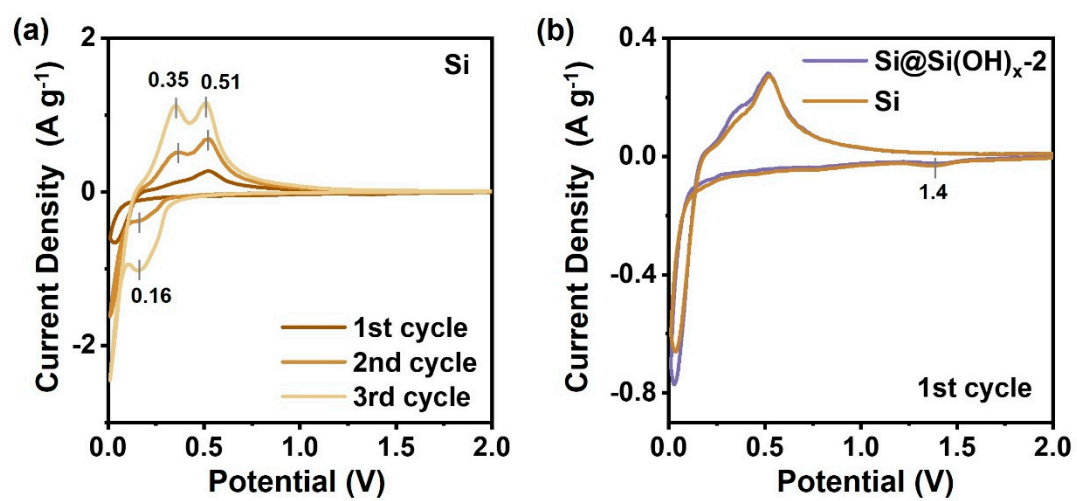

Figure S5. CV curves of (a) the Si anode and (b) the Si and Si@Si(OH)<sub>x-2</sub> anode for 1st cycle at a scan rate of  $0.1 \text{ mV s}^{-1}$ .

Table S2. The anodic performances comparison of different surface treatment methods.

| Material | Pretreatment                                                                                                                        | Postprocessing                     | Binder   | Initial capacity (mA h g <sup>-1</sup> ) | Cycling performance                          | Current density (mA g <sup>-1</sup> ) | Ref.                      |
|----------|-------------------------------------------------------------------------------------------------------------------------------------|------------------------------------|----------|------------------------------------------|----------------------------------------------|---------------------------------------|---------------------------|
| Si       | pretreated in piranha solution (H <sub>2</sub> SO <sub>4</sub> /H <sub>2</sub> O <sub>2</sub> = 3:1 v/v) at 65 °C for 2 h           | ---                                | SA       | 3095.5                                   | 924.3 mA h g <sup>-1</sup> after 200 cycles  | 1000                                  | <a href="#">This work</a> |
| Si       | pretreated in piranha solution (H <sub>2</sub> SO <sub>4</sub> /H <sub>2</sub> O <sub>2</sub> = 3:1 v/v) at 80 °C for 2 h           | ---                                | SA       | 3394.7                                   | 1121.5 mA h g <sup>-1</sup> after 200 cycles | 1000                                  | <a href="#">This work</a> |
| Si       | pretreated in piranha solution (H <sub>2</sub> SO <sub>4</sub> /H <sub>2</sub> O <sub>2</sub> = 3:1 v/v) at 95 °C for 2 h           | ---                                | SA       | 2935.0                                   | 992.3 mA h g <sup>-1</sup> after 200 cycles  | 1000                                  | <a href="#">This work</a> |
| Si       | pretreated in piranha solution (H <sub>2</sub> SO <sub>4</sub> /H <sub>2</sub> O <sub>2</sub> = 3:1 v/v) at 85 °C for 1 h           | ---                                | PAA      | 3300                                     | 335 mA h g <sup>-1</sup> after 50 cycles     | 1000                                  | 1                         |
| Si-MPs   | treated in piranha solution (H <sub>2</sub> SO <sub>4</sub> /H <sub>2</sub> O <sub>2</sub> = 3:1 v/v) at 85 °C for 1-2 h            | ---                                | PAA      | 3420                                     | 600 mA h g <sup>-1</sup> after 50 cycles     | 1000                                  | 2                         |
| Si       | stirred magnetically in piranha solution (H <sub>2</sub> SO <sub>4</sub> /H <sub>2</sub> O <sub>2</sub> = 7:3 v/v) for 2 h at 80 °C | ---                                | SA       | 2720                                     | 750 mA h g <sup>-1</sup> after 50 cycles     | 2000                                  | 3                         |
| Si       | modified by piranha solution (H <sub>2</sub> SO <sub>4</sub> /H <sub>2</sub> O <sub>2</sub> = 3:1 v/v)                              | Coated by Graphene oxide composite | CMC, MTI | 2737                                     | 1,563 mA h g <sup>-1</sup> after 100 cycles  | 0.5 C                                 | 4                         |
| Si       | modified by HCl piranha solution (H <sub>2</sub> SO <sub>4</sub> /H <sub>2</sub> O <sub>2</sub> = 1:4 v/v) for 0.5 h at 85 °C       | ---                                | PAA      | 2907                                     | 737.3 mA h g <sup>-1</sup> after 150 cycles  | 200                                   | 5                         |



Table S3. The fitting data of the Si, Si@Si(OH)<sub>x</sub>-1, Si@Si(OH)<sub>x</sub>-2, and Si@Si(OH)<sub>x</sub>-3 anodes.

| Materials                 | Cycle  | $R_{ct}$ ( $\Omega$ ) / | $Z_w$ - $R$ ( $\Omega$ ) / | $R_{sei}$ ( $\Omega$ ) / | Open circuit  |
|---------------------------|--------|-------------------------|----------------------------|--------------------------|---------------|
|                           |        | error %                 | error %                    | error %                  | potential (V) |
| Si                        | Before | 569/6                   | 799/19                     | ---                      | 3.03          |
| Si@Si(OH) <sub>x</sub> -1 | Before | 530/3                   | 629/22                     | ---                      | 3.08          |
| Si@Si(OH) <sub>x</sub> -2 | Before | 404/3                   | 471/15                     | ---                      | 3.09          |
| Si@Si(OH) <sub>x</sub> -3 | Before | 554/3                   | 669/17                     | ---                      | 3.05          |
| Si                        | 200th  | 1041/7                  | 1173/12                    | 81/2                     | 0.42          |
| Si@Si(OH) <sub>x</sub> -1 | 200th  | 871/14                  | 821/14                     | 77/3                     | 0.42          |
| Si@Si(OH) <sub>x</sub> -2 | 200th  | 830/8                   | 697/12                     | 70/5                     | 0.42          |
| Si@Si(OH) <sub>x</sub> -3 | 200th  | 854/16                  | 946/7                      | 73/6                     | 0.45          |

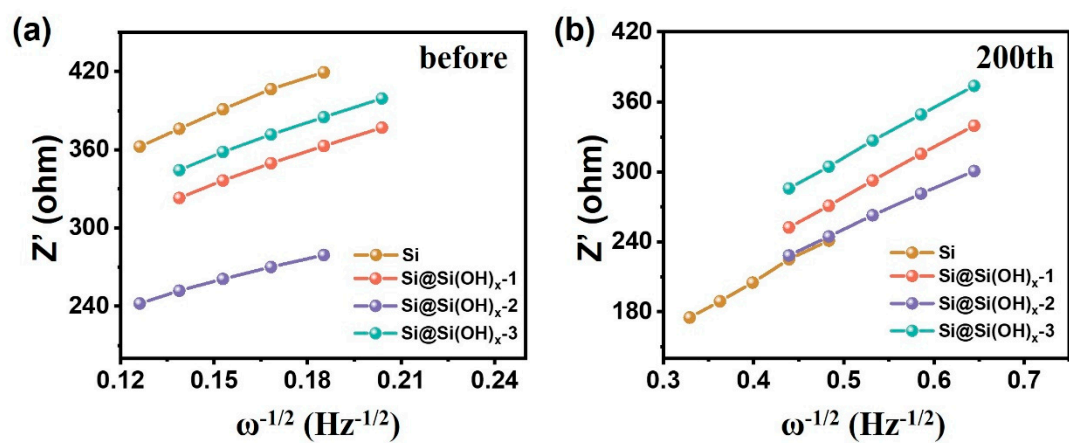

Figure S6.  $Z' \sim \omega^{-1/2}$  linear relationship diagram of (a) before cycling and (b) after 200 cycles.

Table S4. The fitting Warburg parameters of the Si, Si@Si(OH)<sub>x</sub>-1, Si@Si(OH)<sub>x</sub>-2, and Si@Si(OH)<sub>x</sub>-3 anodes.

| Materials                 | Cycle  | $\sigma$ |
|---------------------------|--------|----------|
| Si                        | Before | 976.20   |
| Si@Si(OH) <sub>x</sub> -1 | Before | 825.48   |
| Si@Si(OH) <sub>x</sub> -2 | Before | 624.51   |
| Si@Si(OH) <sub>x</sub> -3 | Before | 840.05   |
| Si                        | 200th  | 435.59   |
| Si@Si(OH) <sub>x</sub> -1 | 200th  | 426.80   |
| Si@Si(OH) <sub>x</sub> -2 | 200th  | 353.44   |
| Si@Si(OH) <sub>x</sub> -3 | 200th  | 429.47   |

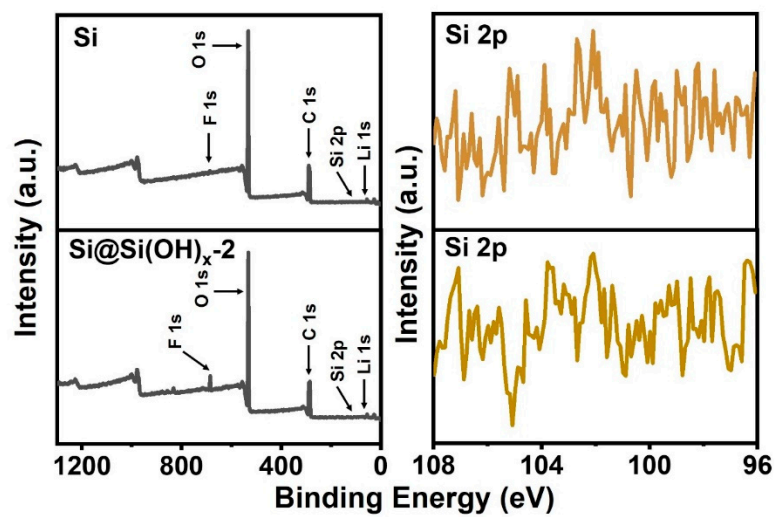

Figure S7. XPS spectra of the Si and Si@Si(OH)<sub>x-2</sub> electrode after 200 cycles.

## References

1. Jung, C. H.; Kim, K. H.; Hong, S. H. Stable silicon anode for lithium-ion batteries through covalent bond formation with a binder via esterification. *ACS Appl. Mater. Interfaces* **2019**, *11*, 26753–26763.
2. Jung, C. H.; Kim, K. H.; Hong, S. H. An in situ formed graphene oxide-polyacrylic acid composite cage on silicon microparticles for lithium ion batteries via esterification reaction. *J. Mater. Chem. A* **2019**, *7*, 12763-12772.
3. Guo, S. T.; Li, H.; Li, Y. Q.; Han, Y.; Chen, K.; Xu, G. Z.; Zhu, Y. J.; Hu, X. L. SiO<sub>2</sub>-enhanced structural stability and strong adhesion with a new binder of konjac glucomannan enables stable cycling of silicon anodes for lithium-ion batteries. *Adv. Energy Mater.* **2018**, *8*, 1800434,
4. Cen, Y. J.; Qin, Q. W.; Sisson, R. D.; Liang, J. Y. Effect of particle size and surface treatment on Si/graphene nanocomposite lithium-ion battery anodes. *Electrochim. Acta* **2017**, *251*, 690–698,
5. Li, C.; Shi, T. F.; Li, D. C.; Yoshitake, H.; Wang, H. Y. Effect of surface modification on electrochemical performance of nano-sized Si as an anode material for Li-ion batteries. *RSC Adv.* **2016**, *6*, 34715-34723.
